# Supplementary material
Source: Research Square preprint supplement (doi:10.21203/rs.3.rs-9195763/v1)
Supplement: Supplementary file 1 [file 0da16a0d5824c4db04d69bc9.docx]

Table 2. Summary of findings and certainty of evidence (GRADE) for PAS versus non-PAS in minimally invasive gastrectomy for gastric cancer.

| Outcome | Assumed risk / mean (Non-PAS) | Corresponding risk / mean (PAS) | Relative effect (95% CI) | Participants (studies) | Certainty (GRADE) | Comments |
| --- | --- | --- | --- | --- | --- | --- |
| Overall complications | 177 per 1000 | 207 per 1000 (170 to 250) | OR 1.21 (0.95 to 1.55) | 1851 (6 studies; 7 cohorts) | ⊕⊕◯◯ LOW | a |
| Conversion to open surgery | 33 per 1000 | 56 per 1000 (27 to 115) | OR 1.75 (0.80 to 3.81) | 855 (4 studies; 4 cohorts) | ⊕◯◯◯ VERY LOW | a,b |
| Operative time (min) | — | — | SMD 0.23 higher (0.03 to 0.43 higher) | 1851 (6 studies; 7 cohorts) | ⊕◯◯◯ VERY LOW | a,c |
| Blood loss (mL) | — | — | SMD 0.05 higher (−0.05 to 0.15) | 1763 (5 studies; 6 cohorts) | ⊕⊕◯◯ LOW | a |
| Lymph node yield (No.) | — | — | SMD 0.03 higher (−0.17 to 0.24) | 681 (4 studies; 5 cohorts) | ⊕⊕◯◯ LOW | a |
| Length of stay (days) | — | — | SMD 0.10 higher (0.00 to 0.20 higher) | 1763 (5 studies; 6 cohorts) | ⊕⊕◯◯ LOW | a |

Footnotes

a All included studies were observational cohort studies; therefore, certainty was initially rated as low according to GRADE. Residual confounding and selection bias could not be excluded.

b Downgraded one level for serious imprecision due to the low number of events and a wide 95% confidence interval crossing no effect and including potentially important harm.

c Downgraded one level for serious inconsistency due to moderate heterogeneity in operative time across studies (I² ≈ 60%).

Publication bias could not be reliably assessed because fewer than 10 studies were available for each outcome.

For dichotomous outcomes, the assumed risk was calculated from the pooled event rate in the non-PAS group among studies contributing to that specific meta-analysis. Corresponding risk in the PAS group was derived from the assumed risk and the pooled OR.
