# Supplementary material
Source: Research Square preprint supplement (doi:10.21203/rs.3.rs-9195763/v1)
Supplement: Supplementary file 2 [file 716bda835fe363a92e28df30.docx]

**Highlights**

1. This is the first systematic review and meta-analysis specifically focused on this issue in gastric cancer surgery. The findings may help gastrointestinal surgeons make more evidence-based decisions regarding operative indications, preoperative risk assessment, and intraoperative strategy.
2. Six studies involving seven comparative cohorts and up to 1,851 patients were included.
3. Previous abdominal surgery was not associated with higher overall complications or conversion to open surgery.
4. It was associated with longer operative time and a slightly longer postoperative hospital stay.
5. Previous abdominal surgery should not be considered an absolute contraindication to minimally invasive gastrectomy.
