# Supplementary material
Source: Research Square preprint supplement (doi:10.21203/rs.3.rs-9195763/v1)
Supplement: Supplementary file 3 [file 7b2c1d2c6af13aa97cb9b8e0.docx]

# Table S4 Full-text articles reviewed but not included.

| **No.** | **Study ID** | **Title** | **Exclusion reason** | **DOI** |
| --- | --- | --- | --- | --- |
| 1 | Yamashita 2017 | Safety and feasibility of laparoscopic gastrectomy for gastric cancer patients with a history of abdominal surgery | Single-arm report | 10.1007/s00595-017-1506-x |
| 2 | X Jiang 2011 | Laparoscopy-assisted gastrectomy in patients with previous endoscopic resection for early gastric cancer | Endoscopic resection | 10.1002/bjs.7358 |
| 3 | Hee Sung Kim 2014 | Laparoscopic gastrectomy in patients with previous gastrectomy for gastric cancer: a report of 17 cases | Case report | 10.1097/SLE.0b013e31828f6bfb |
| 4 | Hang Joo Cho 2009 | Laparoscopy-assisted completion total gastrectomy for gastric cancer in remnant stomach: report of 2 cases | Case report | 10.1097/SLE.0b013e31819cd62c |
| 5 | Masanori Tokunaga 2010 | Laparoscopy-assisted gastrectomy for patients with earlier upper abdominal open surgery | Single-arm report | 10.1097/SLE.0b013e3181cdebdd |
| 6 | Hironori Tsujimoto 2012 | Laparoscopic gastrectomy after incomplete endoscopic resection for early gastric cancer | Endoscopic resection | 10.3892/or.2012.2046 |
| 7 | Nobutsugu Abe 2011 | Long-term outcomes of combination of endoscopic submucosal dissection and laparoscopic lymph node dissection without gastrectomy for early gastric cancer patients who have a potential risk of lymph node metastasis | Endoscopic resection | 10.1016/j.gie.2011.06.006 |
| 8 | Guanqun Liao 2016 | Laparoscopic gastrectomy for remnant gastric cancer: Risk factors associated with conversion and a systematic analysis of literature | Single-arm report | 10.1016/j.ijsu.2016.08.013 |
