# Supplementary material
Source: Research Square preprint supplement (doi:10.21203/rs.3.rs-9195763/v1)
Supplement: Supplementary file 4 [file 7fc0e46ef92b4ca2f985bd5a.docx]

Table.1 Characteristics of the studies included in the meta-analysis

| Author | Year | Country | Study Design | Language | Whether previous abdominal surgery | Type/location of previous surgery | N | Age | Male(%) | BMI (kg/m2) |
| --- | --- | --- | --- | --- | --- | --- | --- | --- | --- | --- |
| Nunobe | 2008 | Japan | Retrospective cohort | English | Yes | Previous laparotomy | *50* | *63.1 ± 1.6 (SE)b* | *42.0* | *22.9 ± 0.5 (SE)b* |
|  |  |  |  |  | No | *NA* | *89* | *64.8 ± 1.1 (SE)b* | *61.8* | *22.6 ± 0.3 (SE)b* |
| Tsunoda | 2013 | Japan | Matched-pair retrospective cohort | English | Yes | Upper abdominal surgery history | *22* | *68.2 (50-82)c* | *68.2* | *21.6d* |
|  |  |  |  |  | No | *NA* | *66* | *67.2 (50-89)c* | *62.1* | *21.6d* |
| Kawamura 1 | 2009 | Japan | Retrospective cohort | English | Yes | Previous intra-abdominal surgery | *8* | *NA* | *NA* | *NA* |
|  |  |  |  |  | No | *NA* | *84* | *NA* | *NA* | *NA* |
| Kawamura 2 | 2009 | Japan | Retrospective cohort | English | Yes | Previous intra-abdominal surgery | *2* | *NA* | *NA* | *NA* |
|  |  |  |  |  | No | *NA* | *32* | *NA* | *NA* | *NA* |
| Liao | 2012 | China | Retrospective cohort | Chinese | Yes | Previous abdominal surgery | *57* | *64.3 ± 9.9a* | *80.7* | *22.0 ± 2.9a* |
|  |  |  |  |  | No | *NA* | *271* | *62.2 ± 10.1a* | *80.8* | *21.7 ± 2.6a* |
| Li | 2014 | China | Retrospective cohort | Chinese | Yes | Previous abdominal surgery | *150* | *45.82 ± 7.25a* | *65.3* | *NA* |
|  |  |  |  |  | No | *NA* | *150* | *42.76 ± 6.91a* | *68.7* | *NA* |
| Qu | 2025 | China | Retrospective cohort (PSM) | Chinese | Yes | Previous abdominal surgery | *435* | *60.7 ± 11.7a* | *58.2* | *22.5 ± 3.2a* |
|  |  |  |  |  | No | *NA* | *435* | *60.6 ± 10.8a* | *58.2* | *22.4 ± 3.1a* |

Footnote: Kawamura 1 = laparoscopic-assisted distal gastrectomy (LADG); Kawamura 2 = laparoscopic-assisted total gastrectomy (LATG).

Abbreviations: BMI, body mass index; PSM, propensity score matching; NA, measurement not available; SE, *standard error*

*a means ± standard deviation*

*b* *means ± standard error*

*c median [range]*

*d means (measure of dispersion not reported)*
