# Supplementary material
Source: Research Square preprint supplement (doi:10.21203/rs.3.rs-9195763/v1)

**Study**

**Odds Ratio**

**with 95% CI**

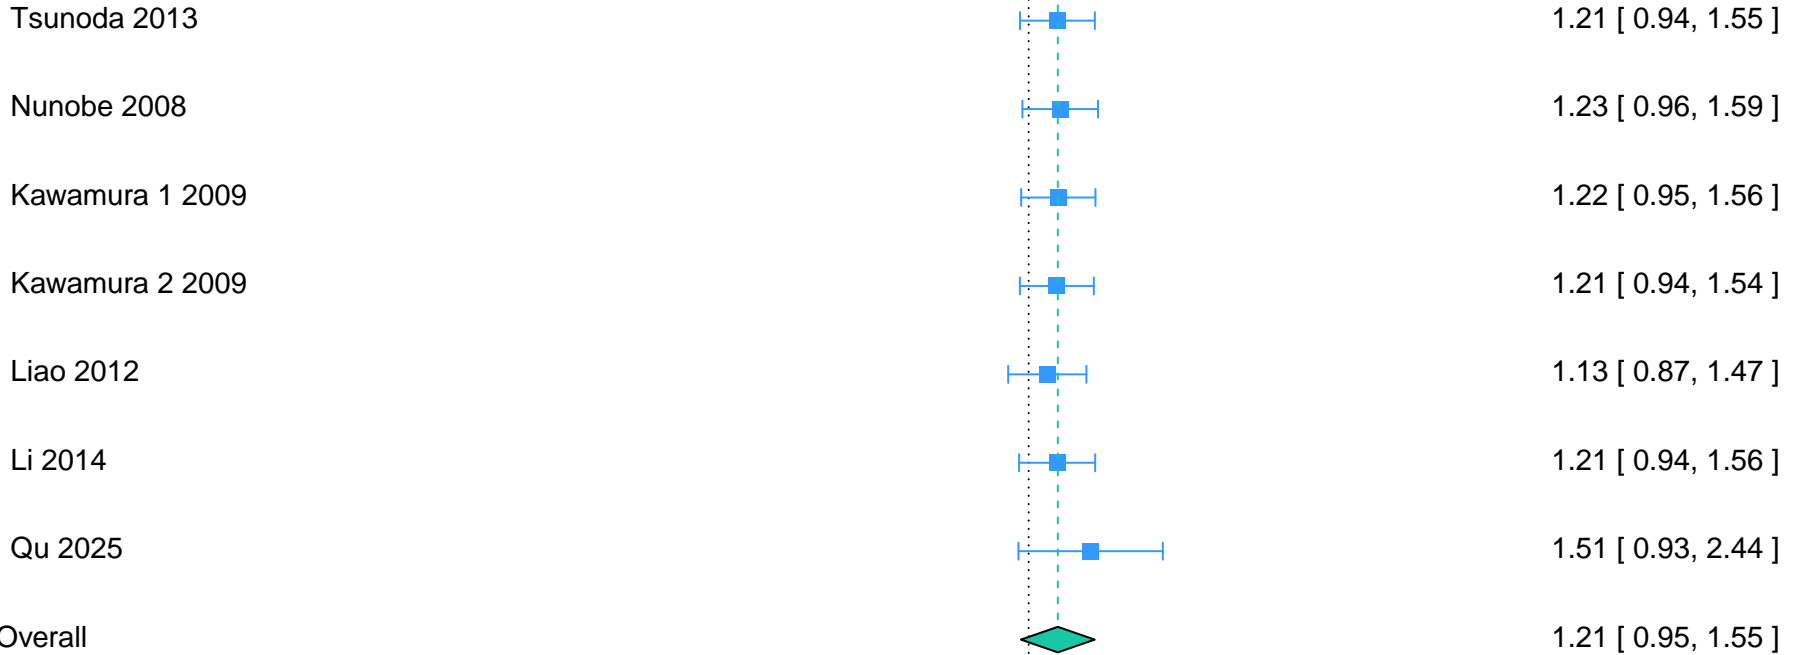

Heterogeneity: tau2 = 0.00, I2 = 0.00%, H2 = 1.00

Test of heterogeneity: Q(6) = 3.43, p = 0.75

Test of  $\mu = 0$ : z = 1.55, p = 0.12

Random-effects DerSimonian-Laird model

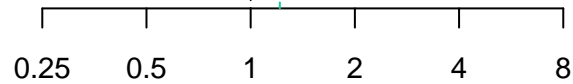

Supplement: Supplementary file 5 [file 8459ff20909dd8cb5fe06a62.pdf]
