# Supplementary material
Source: Research Square preprint supplement (doi:10.21203/rs.3.rs-9195763/v1)
Supplement: Supplementary file 6 [file a6489bb9a2f009d3540236a1.docx]

**Table S3. Detailed types of previous abdominal surgery reported in the PAS group across the included studies**

| Author | Year | PAS | N | Percentage |
| --- | --- | --- | --- | --- |
| Kawamura | 2009 | Laparoscopic cholecystectomy (LC) | *3* | *18.8%* |
|  |  | Open cholecystectomy (OC) | *3* | *18.8%* |
|  |  | Colectomy for colon cancer | *3* | *18.8%* |
|  |  | Graft replacement / vascular surgery for aortic aneurysm | *2* | *12.5%* |
|  |  | Distal gastrectomy for gastric cancer | *5* | *31.3%* |
|  |  | Appendectomy | *4* | *25.0%* |
|  |  | Oophorectomy | *1* | *6.3%* |
| Tsunoda | 2013 | cholecystectomy | *3* | *13.6%* |
|  |  | laparoscopic cholecystectomy | *3* | *13.6%* |
|  |  | laparoscopic right hemicolectomy | *2* | *9.1%* |
|  |  | pylorus-preserving gastrectomy (PPG) | *1* | *4.5%* |
|  |  | laparoscopic gastrojejunostomy | *2* | *9.1%* |
|  |  | partial gastrectomy | *1* | *4.5%* |
|  |  | distal pancreatectomy | *1* | *4.5%* |
|  |  | distal gastrectomy (DG) (Billroth-II) | *2* | *9.1%* |
|  |  | transabdominal left nephrectomy | *1* | *4.5%* |
|  |  | distal gastrectomy (DG) (Billroth-II) + cholecystectomy | *1* | *4.5%* |
|  |  | ileocecal resection | *1* | *4.5%* |
|  |  | partial hepatectomy (segment 8) + cholecystectomy | *1* | *4.5%* |
|  |  | radical hysterectomy + para-aortic node dissection | *1* | *4.5%* |
|  |  | aortofemoral bypass | *1* | *4.5%* |
|  |  | right hemicolectomy | *1* | *4.5%* |
| Nunobe | 2008 | Appendectomy | *28* | *56.0%* |
|  |  | Gynecological procedure | *16* | *32.0%* |
|  |  | Urological procedure | *5* | *10.0%* |
|  |  | Colorectal procedure | *4* | *8.0%* |
|  |  | Cholecystectomy | *3* | *6.0%* |
|  |  | Small intestine procedure | *1* | *2.0%* |
|  |  | Stomach (local excision) | *1* | *2.0%* |
|  |  | Pancreas injury (procedure) | *1* | *2.0%* |
|  |  | Liver abscess (procedure) | *1* | *2.0%* |
|  |  | Peritonitis (procedure) | *1* | *2.0%* |
| Liao | 2012 | Previous gastric surgery (distal subtotal gastrectomy) | *13* | *22.8%* |
|  |  | Appendiceal surgery (appendectomy) | *21* | *36.8%* |
|  |  | Gynecological surgery | *7* | *12.3%* |
|  |  | Biliary tract surgery | *6* | *10.5%* |
|  |  | Urological surgery | *5* | *8.8%* |
|  |  | Colorectal surgery | *3* | *5.3%* |
|  |  | Liver surgery | *1* | *1.8%* |
|  |  | Small intestine surgery | *1* | *1.8%* |
| Li | 2014 | subtotal gastrectomy | *3* | *2.0%* |
|  |  | gastric perforation repair | *20* | *13.3%* |
|  |  | splenectomy | *6* | *4.0%* |
|  |  | liver repair | *2* | *1.3%* |
|  |  | liver cyst fenestration | *5* | *3.3%* |
|  |  | exploratory laparotomy | *21* | *14.0%* |
|  |  | appendiceal surgery | *35* | *23.3%* |
|  |  | bowel resection | *6* | *4.0%* |
|  |  | uterine fibroid surgery | *24* | *16.0%* |
|  |  | cesarean section | *17* | *11.3%* |
|  |  | adnexal surgery | *11* | *7.3%* |
| Qu | 2025 | Not reported | *NA* | *NA* |

**Footnote:** Categories of previous abdominal surgery were not mutually exclusive; a single patient could have more than one prior abdominal operation. Therefore, the sum of percentages may exceed 100%.

**Abbreviations**: PAS: Previous abdominal surgery; DG: Distal gastrectomy; PPG: Pylorus-preserving gastrectomy; NA: Not available.
