# Supplementary material
Source: Research Square preprint supplement (doi:10.21203/rs.3.rs-9195763/v1)
Supplement: Supplementary file 7 [file c3008c0947469715c3eb7e4d.docx]

**Table S1 Search strategy of the meta-analysis**

| **Database** | **Search strategy** | | **N** |
| --- | --- | --- | --- |
| **Pubmed n=417** | **#1** | " Stomach Neoplasms"[Mesh] | 121137 |
| **#2** | "Neoplasm, Stomach"[Title/Abstract] OR "Stomach Neoplasm"[Title/Abstract] OR "Gastric Neoplasms"[Title/Abstract] OR "Gastric Neoplasm"[Title/Abstract] OR "Neoplasm, Gastric"[Title/Abstract] OR "Neoplasms, Gastric"[Title/Abstract] OR "Neoplasms, Stomach"[Title/Abstract] OR "Cancer of Stomach"[Title/Abstract] OR "Stomach Cancers"[Title/Abstract] OR "Cancer of the Stomach"[Title/Abstract] OR "Gastric Cancer"[Title/Abstract] OR "Cancer, Gastric"[Title/Abstract] OR "Cancers, Gastric"[Title/Abstract] OR "Gastric Cancers"[Title/Abstract] OR "Stomach Cancer"[Title/Abstract] OR "Cancers, Stomach"[Title/Abstract] OR "Cancer, Stomach"[Title/Abstract] | 105,935 |
| **#3** | #1 OR #2 | 155586 |
| **#4** | "Gastrectomy"[Mesh] | 44648 |
| **#5** | " Gastrectomies "[Title/Abstract] | 1385 |
| **#6** | #4 OR #5 | 45055 |
| **#7** | ((previous OR prior OR history) AND (abdominal surg* OR laparotom* OR "upper abdominal")) OR adhesion* OR "Abdominal Adhesions"[MeSH] | 418529 |
| **#8** | #3 AND #6 AND #7 | 417 |
| **Embase n=170** | **#1** | 'stomach tumor'/exp | 233698 |
| **#2** | 'gastric mass (tumor)':ti,ab OR 'gastric masses (tumor)':ti,ab OR 'gastric neoplasia':ti,ab OR 'gastric neoplasm':ti,ab OR 'gastric subepithelial tumor':ti,ab OR 'gastric tumor':ti,ab OR 'gastric tumorigenesis':ti,ab OR 'gastric tumour':ti,ab OR 'mucosa tumor, stomach':ti,ab OR 'mucosa tumour, stomach':ti,ab OR 'neoplasia of the stomach':ti,ab OR 'neoplasm of the stomach':ti,ab OR 'neoplasms of the stomach':ti,ab OR 'neoplastic gastric':ti,ab OR 'neoplastic stomach':ti,ab OR 'stomach mucosa tumor':ti,ab OR 'stomach mucosa tumour':ti,ab OR 'stomach neoplasia':ti,ab OR 'stomach neoplasm':ti,ab OR 'stomach neoplasms':ti,ab OR 'stomach tumorigenesis':ti,ab OR 'stomach tumour':ti,ab OR 'stomach ulcerated tumor':ti,ab OR 'stomach ulcerated tumour':ti,ab OR 'stomach ulcerating tumor':ti,ab OR 'stomach ulcerating tumour':ti,ab OR 'tumor of the gastric':ti,ab OR 'tumor of the stomach':ti,ab OR 'tumor, stomach mucosa':ti,ab OR 'tumour of the gastric':ti,ab OR 'tumour of the stomach':ti,ab OR 'tumour, stomach mucosa':ti,ab OR 'stomach tumor':ti,ab | 7641 |
| **#3** | #1 OR #2 | 234686 |
| **#4** | 'gastrectomy'/exp | 92456 |
| **#5** | 'gastric resection':ti,ab OR 'gastroresection':ti,ab OR 'hemigastrectomy':ti,ab OR 'resection, gastric':ti,ab OR 'stomach extirpation':ti,ab OR 'stomach resection':ti,ab OR 'stomach transection':ti,ab OR 'gastrectomy':ti,ab | 68208 |
| **#6** | #4 OR #5 | 100507 |
| **#7** | 'patient history of surgery'/exp | 31514 |
| **#8** | 'history of surgery':ti,ab OR 'previous surgery':ti,ab OR 'prior surgery':ti,ab OR 'patient history of surgery':ti,ab | 16970 |
| **#9** | #7 OR #8 | 42100 |
| **#10** | #3 AND #6 AND #9 | 170 |
| **Cochrane n=21** | **#1** | MeSH descriptor: [Stomach Neoplasms] explode all trees | 4313 |
| **#2** | (Cancers, Stomach):ti,ab,kw OR (Gastric Cancer):ti,ab,kw OR (Cancer of the Stomach):ti,ab,kw OR (Cancer, Gastric):ti,ab,kw OR (Cancers, Gastric):ti,ab,kw OR (Cancer, Stomach):ti,ab,kw OR (Stomach Cancer):ti,ab,kw OR (Gastric Cancers):ti,ab,kw OR (Cancer of Stomach):ti,ab,kw OR (Stomach Cancers):ti,ab,kw OR (Gastric Cancer, Familial Diffuse):ti,ab,kw OR (Neoplasm, Gastric):ti,ab,kw OR (Neoplasms, Stomach):ti,ab,kw OR (Gastric Neoplasm):ti,ab,kw OR (Neoplasms, Gastric):ti,ab,kw OR (Gastric Neoplasms):ti,ab,kw OR (Neoplasm, Stomach):ti,ab,kw OR (Stomach Neoplasm):ti,ab,kw | 13308 |
| **#3** | #1 OR #2 | 13308 |
| **#4** | MeSH descriptor: [Gastrectomy] explode all trees | 1839 |
| **#5** | (Gastrectomies):ti,ab,kw | 82 |
| **#6** | #4 OR #5 | 1895 |
| **#7** | (Previous Abdominal Surgery) OR (History of Abdominal Surgery) OR (Previous Abdominal Surgery History) | 4113 |
| **#8** | #3 AND #6 AND #7 | 21 |
