# Supplementary material
Source: Research Square preprint supplement (doi:10.21203/rs.3.rs-9195763/v1)
Supplement: Supplementary file 8 [file cccc2fdb43fa512018faa3dd.docx]

AMSTAR 2: a critical appraisal tool for systematic reviews that include randomised or non- randomised studies of healthcare interventions, or both

|  | **1. Did the research questions and inclusion criteria for the review include the components of PICO?** | | | |
| --- | --- | --- | --- | --- |
| For Yes:  Optional (recommended)   Timeframe for follow-up ☑ Yes   No     Population   Intervention   Comparator group  Outcome | | |  |
| **2. Did the report of the review contain an explicit statement that the review methods were established prior to the conduct of the review and did the report justify any significant deviations**  **from the protocol?** | | | |
| For Partial Yes:  The authors state that they had a written protocol or guide that included ALL the following:   review question(s)   a search strategy   inclusion/exclusion criteria  a risk of bias assessment |  a meta-analysis/synthesis plan,  For Yes:  As for partial yes, plus the protocol  should be registered and should also  have specified:  if appropriate, *and*   a plan for investigating causes  of heterogeneity   justification for any deviations  from the protocol | ☑ Yes   Partial Yes  No |  |
| **3. Did the review authors explain their selection of the study designs for inclusion in the review?** | | | |
| For Yes, the review should satisfy ONE of the following:   *Explanation for* including only RCTs  ☑ Yes   No   OR *Explanation for* including only NRSI   OR *Explanation for* including both RCTs and NRSI | | |  |
| **4. Did the review authors use a comprehensive literature search strategy?**  For Partial Yes (all the following): | | | | |
|  |  searched at least 2 databases (relevant to research question)   provided key word and/or  search strategy   justified publication restrictions  (e.g. language) | For Yes, should also have (all the following):   searched the reference lists /  bibliographies of included studies   searched trial/study registries  included/consulted content  experts in the field   where relevant, searched for  grey literature   conducted search within 24  months of completion of the review | ☑ Yes   Partial Yes  No |  |
| **5. Did the review authors perform study selection in duplicate?** | | | |
| For Yes, either ONE of the following:   at least two reviewers independently agreed on selection of eligible studies  and achieved consensus on which studies to include   OR two reviewers selected a sample of eligible studies and achieved good  agreement (at least 80 percent), with the remainder selected by one reviewer. | | ☑ Yes  No |  |

AMSTAR 2: a critical appraisal tool for systematic reviews that include randomised or non- randomised studies of healthcare interventions, or both

|  | | **6. Did the review authors perform data extraction in duplicate?** | | | | |
| --- | --- | --- | --- | --- | --- | --- |
|  |  | For Yes, either ONE of the following:   at least two reviewers achieved consensus on which data to extract from  included studies   OR two reviewers extracted data from a sample of eligible studies and  achieved good agreement (at least 80 percent), with the remainder extracted by one reviewer. | | ☑ Yes  No | |  |
|  | | **7. Did the review authors provide a list of excluded studies and justify the exclusions?** | | | | |
|  |  | For Partial Yes:  For Yes, must also have:   Justified the exclusion from  the review of each potentially  relevant study   provided a list of all potentially  ☑ Yes   Partial Yes   No  relevant studies that were read in full-text form but excluded from the review | | | |  |
| **8. Did the review authors describe the included studies in adequate detail?**  For Partial Yes (ALL the following): | | | | | | |
|  |  |  described populations   described interventions   described comparators   described outcomes   described research designs | For Yes, should also have ALL the following:   described population in detail  described intervention in  detail (including doses where relevant)   described comparator in detail  (including doses where relevant)   described study’s setting  timeframe for follow-up | ☑ Yes   Partial Yes  No | |  |
|  | | **9. Did the review authors use a satisfactory technique for assessing the risk of bias (RoB) in**  **individual studies that were included in the review?** | | | | |
|  |  | **RCTs**  For Partial Yes, must have assessed RoB from   unconcealed allocation, *and*   lack of blinding of patients and  assessors when assessing outcomes (unnecessary for objective outcomes such as all- cause mortality) | For Yes, must also have assessed RoB from:   allocation sequence that was  not truly random, *and*   selection of the reported result  from among multiple measurements or analyses of a specified outcome |  Yes   Partial Yes   No  ☑ Includes only  NRSI | |  |
|  | **NRSI**  For Partial Yes, must have assessed RoB:   from confounding, *and*  from selection bias | For Yes, must also have assessed RoB:  methods used to ascertain  exposures and outcomes, *and*  selection of the reported result  from among multiple measurements or analyses of a specified outcome | ☑ Yes   Partial Yes   No   Includes only  RCTs | |
|  | | 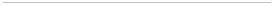**10. Did the review authors report on the sources of funding for the studies included in the review?** | | | | |
| For Yes   Must have reported on the sources of funding for individual studies included  in the review. Note: Reporting that the reviewers looked for this information 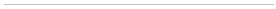but it was not reported by study authors also qualifies | | |  Yes ☑ No | |

AMSTAR 2: a critical appraisal tool for systematic reviews that include randomised or non- randomised studies of healthcare interventions, or both

|  | **11. If meta-analysis was performed did the review authors use appropriate methods for statistical**  **combination of results?** | | |
| --- | --- | --- | --- |
| **RCTs**  For Yes:   The authors justified combining the data in a meta-analysis   AND they used an appropriate weighted technique to combine  study results and adjusted for heterogeneity if present.  AND investigated the causes of any heterogeneity |  Yes   No  ☑ No meta-analysis  conducted |  |
| **For NRSI** For Yes:   The authors justified combining the data in a meta-analysis   AND they used an appropriate weighted technique to combine  study results, adjusting for heterogeneity if present   AND they statistically combined effect estimates from NRSI that  were adjusted for confounding, rather than combining raw data, or justified combining raw data when adjusted effect estimates were not available   AND they reported separate summary estimates for RCTs and  NRSI separately when both were included in the review | ☑ Yes   No   No meta-analysis  conducted |
| **12. If meta-analysis was performed, did the review authors assess the potential impact of RoB in**  **individual studies on the results of the meta-analysis or other evidence synthesis?** | | |
| For Yes:   included only low risk of bias RCTs  ☑ Yes   No   No meta-analysis  conducted   OR, if the pooled estimate was based on RCTs and/or NRSI at variable  RoB, the authors performed analyses to investigate possible impact of RoB on summary estimates of effect. | |  |
| **13. Did the review authors account for RoB in individual studies when interpreting/ discussing the**  **results of the review?** | | |
| For Yes:   included only low risk of bias RCTs  ☑ Yes   No   OR, if RCTs with moderate or high RoB, or NRSI were included the review provided a discussion of the likely impact of RoB on the results | |  |
| **14. Did the review authors provide a satisfactory explanation for, and discussion of, any**  **heterogeneity observed in the results of the review?** | | |
| For Yes:   There was no significant heterogeneity in the results   OR if heterogeneity was present the authors performed an investigation of sources of any heterogeneity in the results and discussed the impact of this  ☑ Yes   No  **15. If they performed quantitative synthesis did the review authors carry out an adequate**  **investigation of publication bias (small study bias) and discuss its likely impact on the results of**  **the review?**  on the results of the review | |  |
|  | | | |
|  | For Yes:   performed graphical or statistical tests for publication bias and discussed  the likelihood and magnitude of impact of publication bias | ☑ Yes   No   No meta-analysis  conducted |  |

AMSTAR 2: a critical appraisal tool for systematic reviews that include randomised or non- randomised studies of healthcare interventions, or both

|  | **16. Did the review authors report any potential sources of conflict of interest, including any funding**  **they received for conducting the review?** | | |
| --- | --- | --- | --- |
| For Yes:   The authors reported no competing interests OR   The authors described their funding sources and how they managed  potential conflicts of interest | ☑ Yes  No |  |

**To cite this tool:** Shea BJ, Reeves BC, Wells G, Thuku M, Hamel C, Moran J, Moher D, Tugwell P, Welch V, Kristjansson E, Henry DA. AMSTAR 2: a critical appraisal tool for systematic reviews that include randomised or non-randomised studies of healthcare interventions, or both. BMJ. 2017 Sep 21;358:j4008.
