# Supplementary material
Source: Research Square preprint supplement (doi:10.21203/rs.3.rs-9195763/v1)
Supplement: Supplementary file 9 [file ceaeb19ad6853ab78dc061d0.docx]

**Table S2 NOS quality assessment report of the meta-analysis**

| Study | Selection | | | | Comparability | Outcome | | | TOTAL |
| --- | --- | --- | --- | --- | --- | --- | --- | --- | --- |
| A | B | C | D | E | F | G | H |
| Tsunoda | 1 | 1 | 1 | 1 | 2 | 1 | 1 | 1 | 9 |
| Nunobe | 1 | 1 | 1 | 1 | 0 | 1 | 1 | 1 | 7 |
| Kawamura | 1 | 1 | 1 | 1 | 0 | 1 | 1 | 1 | 7 |
| Liao | 1 | 1 | 1 | 1 | 2 | 1 | 1 | 1 | 9 |
| Li | 1 | 1 | 1 | 1 | 0 | 1 | 1 | 1 | 7 |
| Qu | 1 | 1 | 1 | 1 | 2 | 1 | 1 | 1 | 9 |
